# Supplementary material for: HIT 2.0: an enhanced platform for Herbal Ingredients' Targets
Source: PubMed Central journal article supplement — Nucleic Acids Res. 2021 Nov 19;50(D1):D1238–43. doi: 10.1093/nar/gkab1011 (PMC8728248; doi:10.1093/nar/gkab1011), 2021-11-19
Supplement: gkab1011_supplemental_file.pdf [file gkab1011_supplemental_file.pdf]

**Table S1.** Keyword library to describe the interaction between herbal ingredients and proteins

|        | <b>Interaction</b>                                                                                                                                                         |                                                                                                                                                                        |                                                                                                 | <b>Effect</b>                                                                                                                                  |
|--------|----------------------------------------------------------------------------------------------------------------------------------------------------------------------------|------------------------------------------------------------------------------------------------------------------------------------------------------------------------|-------------------------------------------------------------------------------------------------|------------------------------------------------------------------------------------------------------------------------------------------------|
|        | Positive                                                                                                                                                                   | Negative                                                                                                                                                               | General                                                                                         |                                                                                                                                                |
| Type A | Agonist; activator                                                                                                                                                         | Antagonist; inhibitor                                                                                                                                                  | Bind; target; bound                                                                             |                                                                                                                                                |
| Type B | Activate; Augment;<br>Ameliorate; Derepress;<br>Elevate; Enhance; Hasten;<br>Increase; Induce; Incitate;<br>Initiate Potentiate; Promote;<br>Raise; Stimulate; Up-regulate | Abrogate; Abolish; Against;<br>Attenuate; Antagonize; Block;<br>Blunt; Down regulate;<br>Decrease; Degrade; Diminish;<br>Impair; Inhibit; Reduce;<br>Repress; Suppress | Affect; Interact;<br>Disturb; Regulate;<br>Impact; Influence;<br>Interfere; Modify;<br>Modulate | Activity; Activation; Level;<br>Expression; Pathway;<br>Cleavage; Methylation;<br>Phosphorylation;<br>Severance; Glycosylation;<br>Acetylation |
